# Supplementary material for: Oligomerization and Adjuvant Activity of Peptides Derived from the VirB4-like ATPase of Clostridioides difficile
Source: MDPI journal article supplement (doi:10.3390/biom13061012), 2023-06-18
Supplement: s1 [file s1]

Table S1. Primers used for the construction of expression plasmids encoding the VirB4 protein fragments.

| NN | Resulting construct | Primers, sense/antisense sequences, <u>RE site</u>                                       | Matrix DNA |
|----|---------------------|------------------------------------------------------------------------------------------|------------|
| 1  | p2321               | #1736, GAACCCCATGGATATAAACCTTAATTAC, NcoI<br>#17, GCTAGTTATTGCTCAGCGG, HindIII           | p1360      |
| 2  | p2322               | #1737, CAACCATGGCTATCTTGGGCGAC, NcoI<br>#17, GCTAGTTATTGCTCAGCGG, HindIII                | p1360      |
| 3  | p2323               | #1738, GTTAGCCATGGTCATTGTGCAAGA, NcoI<br>#17, GCTAGTTATTGCTCAGCGG, HindIII               | p1360      |
| 4  | p2324               | #1739, CTA <sup>T</sup> CTCATGGACGAGTTTCACTTG, NcoI<br>#17, GCTAGTTATTGCTCAGCGG, HindIII | p1360      |
| 5  | p2326               | #1740, GATTTATAACAAAGATCTGCTGCCG, BglII<br>#1741, GTAAAGCTCAAGCTTATTTTCGGGAAG, HindIII   | p2323      |
| 6  | p2327               | #1740, GATTTATAACAAAGATCTGCTGCCG, BglII<br>#1742, CTTCATCTGCTAAGCTTAAATATTAAG, HindIII   | p2323      |
| 7  | p2328               | #1740, GATTTATAACAAAGATCTGCTGCCG, BglII<br>#1743, TCGCCCTAAGCTTAATTGAGCATAAG, HindIII    | p2323      |
| 8  | p2329               | #1740, GATTTATAACAAAGATCTGCTGCCG, BglII<br>#1744, TGTCTCAAAGAAAGCTTACACCTC, HindIII      | p2323      |
| 9  | p2330               | #1740, GATTTATAACAAAGATCTGCTGCCG, BglII<br>#1745, CCCATTAAGCTTAACGCTTCCAAAT, HindIII     | p2323      |
| 10 | p2331               | #1740, GATTTATAACAAAGATCTGCTGCCG, BglII<br>#1746, TCCAAAGCTTAGCGGGTGGATTTC, HindIII      | p2323      |
| 11 | p2335               | #1740, GATTTATAACAAAGATCTGCTGCCG, BglII<br>#1745, CCCATTAAGCTTAACGCTTCCAAAT, HindIII     | p2324      |
| 12 | p2340               | #1740, GATTTATAACAAAGATCTGCTGCCG, BglII<br>#1761, CAATGAGCAAGCTTACTTTTAAAGC, HindIII     | p2322      |
| 13 | p2341               | #1740, GATTTATAACAAAGATCTGCTGCCG, BglII<br>#1762, GCTGCTTTAAAGCTTAGCAGACAAG, HindIII     | p2322      |
| 14 | p2342               | #1740, GATTTATAACAAAGATCTGCTGCCG, BglII<br>#1763, CGTTAAGGCAAGCTTAAACATACAG, HindIII     | p2322      |
| 15 | p2343               | #1740, GATTTATAACAAAGATCTGCTGCCG, BglII<br>#1764, CGGCTAAGCTTACAGCTCGTCGTA, HindIII      | p2322      |
| 16 | p2344               | #16, AATACGACTCACTATAGG, NcoI<br>#1768, GCGGTCAAGCTTACTAAAGGGC, HindIII                  | p994       |
| 17 | p2346               | #1770, GATTTCATGGGTTTCCGTAAATG, NcoI<br>#1771, TCAGGCGCTCTTCCGCTTCCTCGCTCACTG, SapI      | p2323      |
| 18 | p2347               | #1740, GATTTATAACAAAGATCTGCTGCCG, BglII<br>#1772, CAAGAAAGCTTATTTTGCCGGGTGCG, HindIII    | p2321      |
| 19 | p2349               | #1773, GAAGGATTTACATGGATCCATGGT, BamHI<br>#1774, GGTTATTGTCTCTCGAGCGGATAC, XhoI          | p2330      |
| 20 | p2350               | #1776, GCAAGCCGCGCCATGGAAAATATC, NcoI<br>#1771, TCAGGCGCTCTTCCGCTTCCTCGCTCACTG, SapI     | p2346      |
| 21 | p2351               | #1777, CTTGCAAAGCAGCCCATGGTTTCCC, NcoI<br>#1771, TCAGGCGCTCTTCCGCTTCCTCGCTCACTG, SapI    | p2346      |
| 22 | p2352               | #1778, GACCGCTTCCCATGGATACCGAG, NcoI<br>#1771, TCAGGCGCTCTTCCGCTTCCTCGCTCACTG, SapI      | p2346      |
| 23 | p2353               | #16, TAATACGACTCACTATAGG, NcoI<br>#1779, GTTTAAAGCTTAAGGGTTCACATAC, HindIII              | p1360      |
| 24 | p2354               | #1740, GATTTATAACAAAGATCTGCTGCCG, BglII<br>#1741, GTAAAGCTCAAGCTTATTTTCGGGAAG, HindIII   | p2346      |
| 25 | p2355               | #1740, GATTTATAACAAAGATCTGCTGCCG, BglII<br>#1742, CTTCATCTGCTAAGCTTAAATATTAAG, HindIII   | p2346      |
| 26 | p2356               | #1740, GATTTATAACAAAGATCTGCTGCCG, BglII<br>#1743, TCGCCCTAAGCTTAATTGAGCATAAG, HindIII    | p2346      |

|    |                 |                                                                                                                                |                    |
|----|-----------------|--------------------------------------------------------------------------------------------------------------------------------|--------------------|
| 27 | p2357           | #1740, GATTATAACAAAGATCTGCTGCCG, BglII<br>#1744, TGTCTCAAAGAAAGCTTACACCTC, HindIII                                             | p2346              |
| 28 | p2359           | #1740, GATTATAACAAAGATCTGCTGCCG, BglII<br>#1782, TATATAAGCTTACTTATCGTCGTCATCCTTGAATCCATCGATCGCT<br>TCCAAATCTCCACGCTGT, HindIII | p2330              |
| 29 | p2360           | #1780, TATGGGATCCGTCGACCTGCAGGAATTCGGTAC<br>#1781, CATGGTACCGAATTCCTGCAGGTCGACGGATCCCA                                         | Self-<br>annealing |
| 30 | p2361,<br>p2363 | #154, TACGGTGGGATCCCTATATAAGCAGAGC, BamHI<br>#155, TTGTGAAATTTGTGATGCTATTGCTT                                                  | pEGFP-C            |
| 31 | p2370           | #1740, GATTATAACAAAGATCTGCTGCCG, BglII<br>#1786, CTCTTTTAAAGCTTAGTGAAACTCGTC, HindIII                                          | p2330              |
| 32 | p2371           | #1787, CAAGACCATATGTGGAACAGGGTAAC, NdeI<br>#1771, TCAGGCGCTCTTCCGCTTCCTCGCTCACTG, SapI                                         | p2330              |
| 33 | p2373           | #1787, CAAGACCATATGTGGAACAGGGTAAC, NdeI<br>#1771, TCAGGCGCTCTTCCGCTTCCTCGCTCACTG, SapI                                         | p2370              |
| 34 | p2374           | #1740, GATTATAACAAAGATCTGCTGCCG, BglII<br>#1790, AAACAAGCTTAAATCTCCACGCTGTAAGC, HindIII                                        | p2371              |
| 35 | p2375           | #1740, GATTATAACAAAGATCTGCTGCCG, BglII<br>#1791, AAACAAGCTTAGTAAGCTGCCGTCTGTTC, HindIII                                        | p2371              |
| 36 | p2376           | #1740, GATTATAACAAAGATCTGCTGCCG, BglII<br>#1792, AAACAAGCTTACTGTTCTCTTTAAGAGC, HindIII                                         | p2371              |
| 37 | p2377           | #1740, GATTATAACAAAGATCTGCTGCCG, BglII<br>#1793, AAACAAGCTTATAAGAGCAAGTGAAACTCG, HindIII                                       | p2371              |
| 38 | p2378           | #1740, GATTATAACAAAGATCTGCTGCCG, BglII<br>#1788, AAACAAGCTTACTTATCGTCGTCATCCTTGAATCCATGGGGTGAAAC<br>TCGTCCATATA, HindIII       | p2373              |

Table S2. Selective properties of the VirB4-derived peptides. Peptides with high, intermediate, and low oligomerization activities are shown in red, blue, and green respectively. Data on the peptide 2330pept are shown in red bold font.

| NN | Peptide ID      | Length (aa) | pI          | Hydrophobic aa (AILFWV), % |
|----|-----------------|-------------|-------------|----------------------------|
| 1  | 1361pept        | 372         | 5,66        | 35,8                       |
| 2  | 2321pept        | 279         | 5,44        | 36,9                       |
| 3  | 2322pept        | 215         | 6,4         | 37,2                       |
| 4  | 2323pept        | 152         | 6,19        | 35,5                       |
| 5  | 2324pept        | 127         | 5,19        | 37,0                       |
| 6  | 2326pept        | 134         | 8,15        | 37,3                       |
| 7  | 2327pept        | 101         | 8,22        | 37,6                       |
| 8  | 2328pept        | 86          | 6,8         | 37,2                       |
| 9  | 2329pept        | 72          | 9,45        | 36,1                       |
| 10 | <b>2330pept</b> | <b>48</b>   | <b>8,31</b> | <b>33,3</b>                |
| 11 | 2331pept        | 23          | 10,9        | 30,4                       |
| 12 | 2335pept        | 23          | 4,96        | 39,1                       |
| 13 | 2340pept        | 61          | 6,77        | 41,0                       |
| 14 | 2341pept        | 49          | 4,75        | 42,9                       |
| 15 | 2342pept        | 28          | 4,08        | 50                         |
| 16 | 2343pept        | 11          | 3,49        | 43                         |
| 17 | 2346pept        | 104         | 5,33        | 35,5                       |
| 18 | 2347pept        | 62          | 4,43        | 37,1                       |
| 19 | 2350pept        | 80          | 4,75        | 35                         |
| 20 | 2351pept        | 51          | 5,09        | 31,4                       |
| 21 | 2352pept        | 19          | 4,41        | 19,5                       |
| 22 | 2353pept        | 93          | 7,97        | 32,3                       |
| 23 | 2354pept        | 86          | 6,79        | 39,5                       |
| 24 | 2355pept        | 53          | 6,3         | 41,5                       |
| 25 | 2356pept        | 38          | 4,94        | 42,1                       |
| 26 | 2357pept        | 24          | 9,99        | 41,7                       |
| 27 | 2370pept        | 30          | 8,44        | 26,7                       |
| 28 | 2371pept        | 40          | 9,23        | 32,5                       |
| 29 | 2373pept        | 22          | 9,52        | 22,7                       |
| 30 | 2374pept        | 38          | 6,78        | 31,6                       |
| 31 | 2375pept        | 34          | 8,34        | 29,4                       |
| 32 | 2376pept        | 30          | 8,39        | 26,7                       |
| 33 | 2377pept        | 26          | 9,52        | 30,8                       |
| 34 | MBP             | 426         | 5,82        | 34,0                       |
